# Supplementary material
Source: publisher figshare collection journal article supplement (https://aacr.figshare.com/articles/dataset/_/22478745)
Supplement: Supplementary file 1 [file 39930243]

**Safety and Immunogenicity of LY3415244, a Bispecific Antibody Against TIM-3 and PD-L1, in Patients With Advanced Solid Tumors**

**Supplemental Table 5. Tumor Biomarkers**

| <b>Cohort</b> | <b>Type of Cancer</b>               | <b>Best Change in Tumor Size</b> | <b>PD-L1<sup>a</sup> Pre-treatment</b> | <b>TIM-3<sup>b</sup> Pre-treatment</b> | <b>CD8<sup>b</sup> Pre-treatment</b> | <b>CD8<sup>b</sup> Post-treatment</b> |
|---------------|-------------------------------------|----------------------------------|----------------------------------------|----------------------------------------|--------------------------------------|---------------------------------------|
| A1            | Rectal cancer                       | 37.7%                            | <1                                     | 65                                     | 77                                   | 73                                    |
|               | Non-small cell lung cancer          | -29.6%                           | 90 <sup>c</sup>                        | NA <sup>c</sup>                        | NA <sup>c</sup>                      | NA                                    |
|               | Breast cancer                       | 15.7%                            | <1 <sup>c</sup>                        | 8 <sup>c</sup>                         | 22 <sup>c</sup>                      | 43                                    |
| A2            | Non-small cell lung cancer          | 30%                              | <1                                     | 25                                     | 97                                   | 120                                   |
|               | Breast cancer                       | 3.8%                             | <1                                     | 3                                      | 41                                   | NA                                    |
|               | Breast cancer                       | 22.3%                            | <1                                     | 4                                      | 15                                   | 1                                     |
| A3            | Ovarian cancer                      | 6.9%                             | <1                                     | 13                                     | 23                                   | 26                                    |
|               | Desmoplastic small round cell tumor | 8.4%                             | <1                                     | 0                                      | 0                                    | 2                                     |
|               | Peritoneal sarcoma                  | 11.0%                            | <1                                     | 0                                      | 0                                    | 3                                     |
| A4            | Rectal cancer                       | 30.6%                            | 2                                      | 5                                      | 29                                   | 73                                    |
|               | Ductal adenocarcinoma of pancreas   | 14.2%                            | <1                                     | 1                                      | 9                                    | NA                                    |
|               | Breast cancer                       | NE                               | <1                                     | 6                                      | 30                                   | NA                                    |

<sup>a</sup> PD-L1 expression results are reported as tumor proportional score (TPS).

<sup>b</sup> TIM-3 and CD8 expression results are reported as number of positive cells per high power microscopic field.

<sup>c</sup> Tumor markers were assessed by IHC in archival tissue samples at baseline for this patient.

Abbreviations: NA, not applicable; NE, non evaluable; PD-L1, programmed death ligand 1; TIM-3, T cell immunoglobulin and mucin-domain-containing molecule-3.

Note: Tumor biomarkers were measured in fresh samples unless otherwise indicated.
